# Supplementary material for: An Improved Method for TAL Effectors DNA-Binding Sites Prediction Reveals Functional Convergence in TAL Repertoires of Xanthomonas oryzae Strains
Source: PLoS One. 2013 Jul 15;8(7):e68464. doi: 10.1371/journal.pone.0068464 (PMC3711819; doi:10.1371/journal.pone.0068464)
Supplement: Table S5 — Description of the microarray data comparisons performed to identify TALE-regulated genes. Each row corresponds to a pair-wise treatment comparison used in this work to calculate Log Fold changes and select up-regulated genes. Information about the host plant genotype, the query strain, the appropriate reference treatment and the sampling time is provided. Number of TALEs indicates the potential number of TALEs that are expected to be queried for potential rice gene induction activity in that comparison (i.e. difference in TALE numbers between the tested strain and the control treatment). Accession numbers correspond to NCBI GEO Datasets accession numbers. (XLSX) [file pone.0068464.s009.xlsx]

## Sheet: Table_S5
Experiment (accession number)	Specie	Variety	Strain	Hours post inoculation	Reference comparison	Number of TALs analyzed
GSE16793	Oryza sativa	Nipponbare	Xoo PXO99A	2	Mock	17
				4	Mock
				8	Mock
				24	Mock
				96	Mock
			Xoc BLS256	2	Mock	32
				4	Mock
				8	Mock
				24	Mock
				96	Mock
GSE36272	Oryza sativa	Nipponbare	Xoo PXO99A	24	PXO99ME7 (T3SS mutant)	17
					PXO99ME1 (Pthxo1 mutant)	1
					PXO99ME2 (Pthxo6 and Avrxa27 mutant)	2
			XooPXO86	24	Mock	2
			Xoo MAFF311018	24	Mock	18
		IR24	Xoo PXO99A	24	PXO99ME7	17
					PXO99ME1	1
					PXO99ME2	2
			Xoo PXO86	24	Mock	2
			Xoo MAFF311018	24	Mock	18
